# Supplementary material for: EvoPepFold: A Hybrid Evolutionary and Structural Pipeline for AI- Guided Peptide Inhibitor Design Using AlphaFold and Rosetta
Source: Research Square preprint supplement (doi:10.21203/rs.3.rs-7706745/v1), 2025-10-15
Supplement: Supplementary file 1 [file e6ba0ed84fb9ea61fe74b3ea.pdf]

## Supplementary material

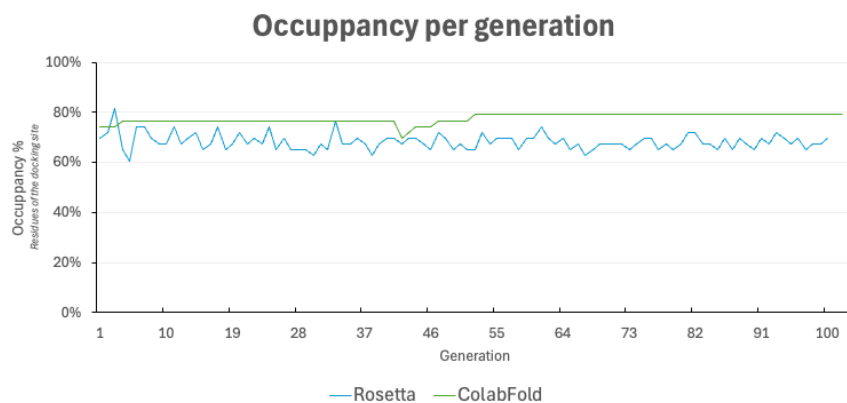

**Supplementary Figure S1.** Occupancy obtained by the best peptide of each of the 100 generations.

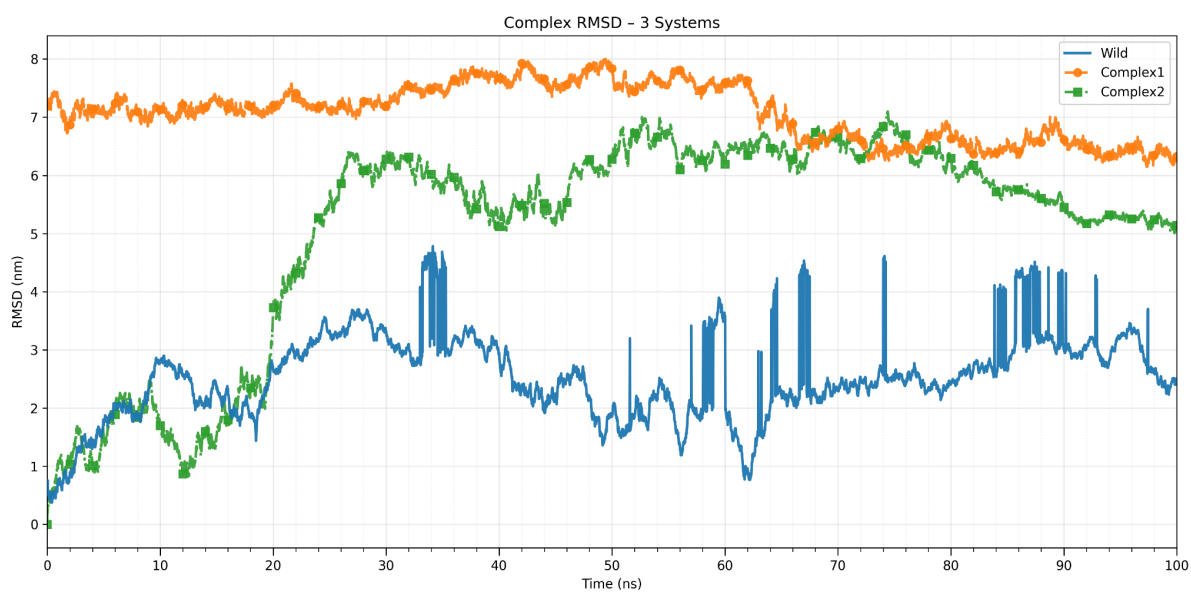

**Supplementary Figure S2.** RMSD of the three simulated systems – Mpro-N3 (Wild), Mpro-AGVAKAKAV (Complex1), and Mpro-VAKAKAV (Complex2) – over 100 ns of molecular dynamics.

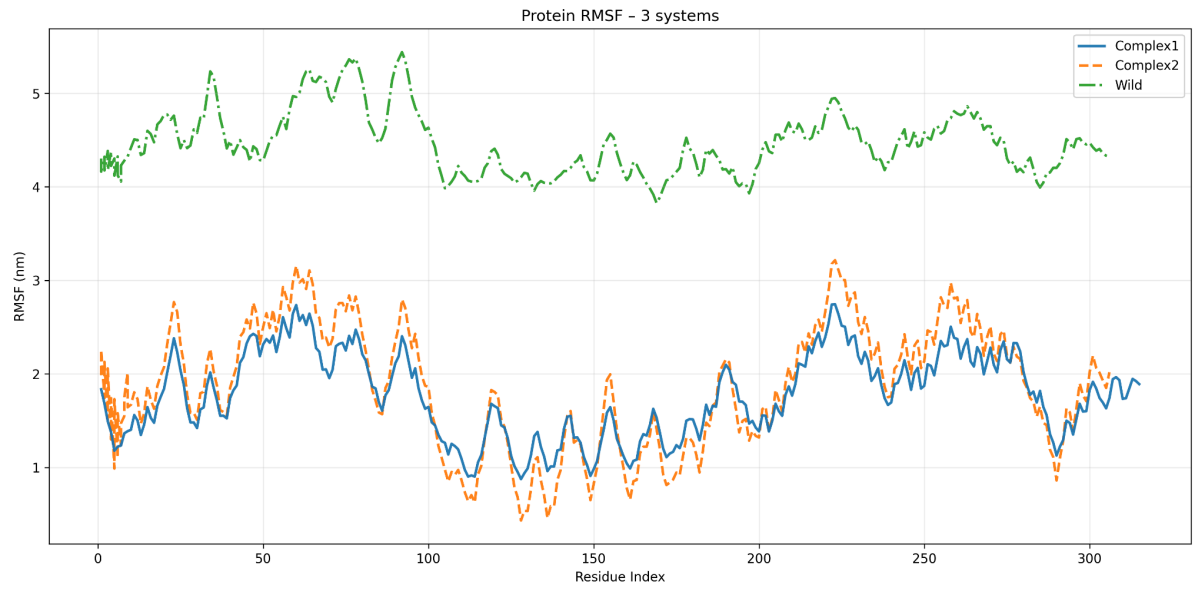

**Supplementary Figure S3.** RMSF of Mpro in complexes with different ligands – Mpro-N3 (Wild), Complex1 (Mpro-AGVAKAKAV), and Complex2 (Mpro-VAKAKAV) – over 100 ns of molecular dynamics simulation.

# Hydrogen Bond Interactions Over Time

## A Mpro-N3

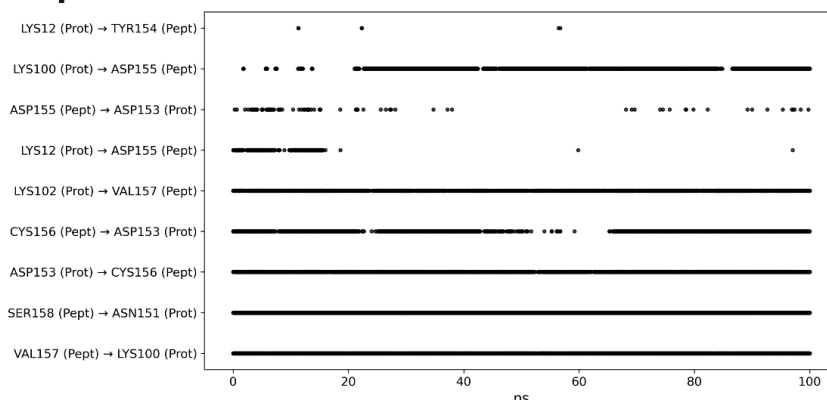

## B Mpro-AGVAKAKAV

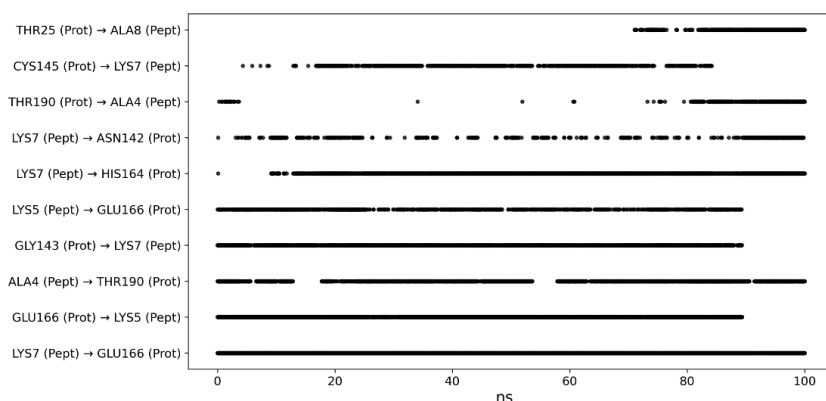

## C Mpro-VAKAKAV

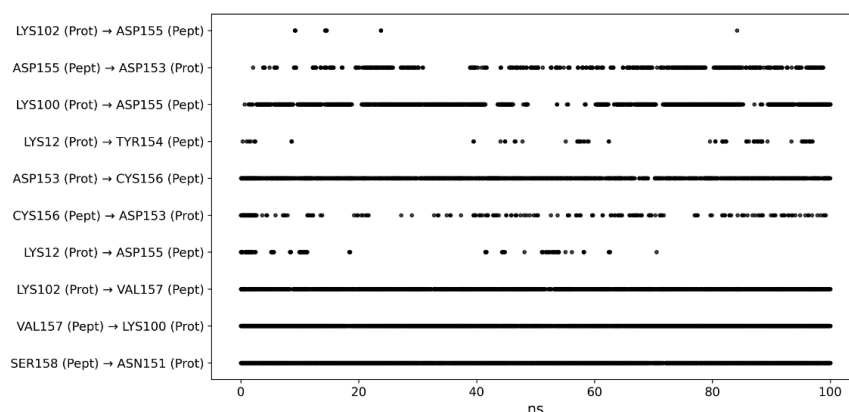

**Supplementary Figure S4.** Hydrogen bonding interactions over 100 ns of molecular dynamics of MPRO with different ligands. Each point represents a frame in which the donor→acceptor pair meets the geometric H-bond criterion (distance H...A  $\leq 3.5$  Å; angle D-H...A  $\geq 135^\circ$ ). Dense bands indicate persistent (high occupancy) bonds, while gaps indicate intermittent contacts. The labels on the y-axis show the binding direction (Protein → Peptide or Peptide → Protein).

# Hydrogen Bond (Frequency)

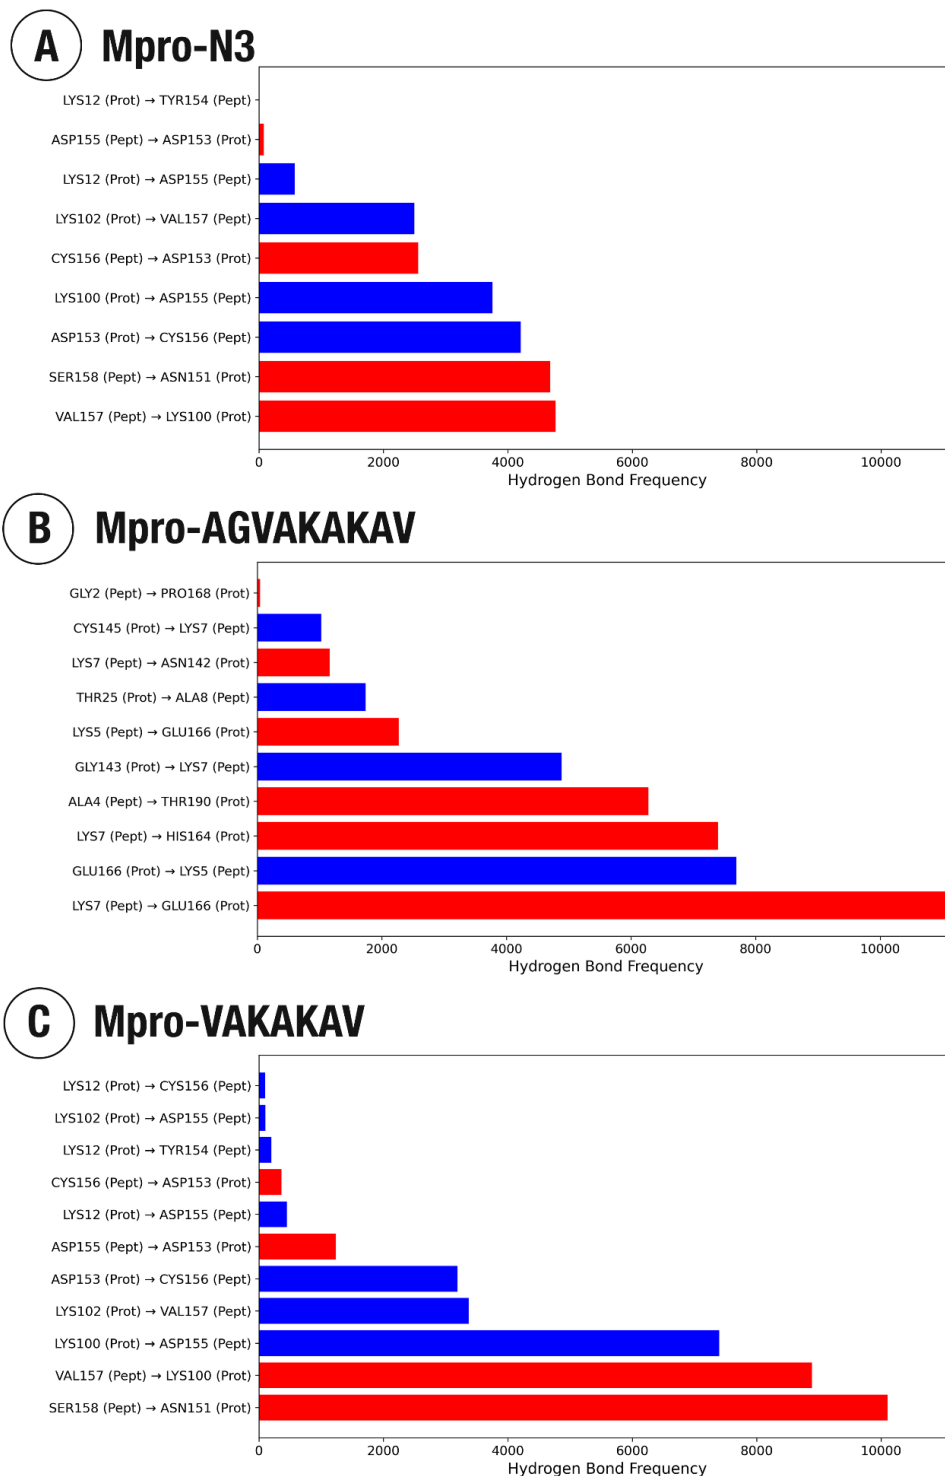

**Supplementary Figure S5.** Cumulative hydrogen bond frequencies across 100 ns molecular dynamics simulations of the reference system (Mpro-N3), Mpro-AGVAKAKAV, and Mpro-VAKAKAV. Interactions directed from Protein to Peptide are represented in blue, while those from Peptide to Protein are shown in red.
